# Supplementary material
Source: PubMed Central journal article supplement (PMC7332392)
Supplement: NIHMS1558164-supplement-Correction.pdf [file NIHMS1558164-supplement-Correction.pdf]

## **Correction to Hasin et al.**

When the article “U.S. Adults With Pain, a Group Increasingly Vulnerable to Nonmedical Cannabis Use and Cannabis Use Disorder: 2001–2002 and 2012–2013,” by Deborah S. Hasin et al. (doi: 10.1176/appi.ajp.2019.19030284), was published online on January 22, 2020, reference 64 cited an incorrect reference. The reference was corrected and the article was reposted on January 30, 2020.
